# Supplementary material
Source: PubMed Central journal article supplement (PMC17759)
Supplement: pnas_96_16_9212__1.pdf [file pnas_96_16_9212__1.pdf]

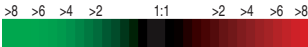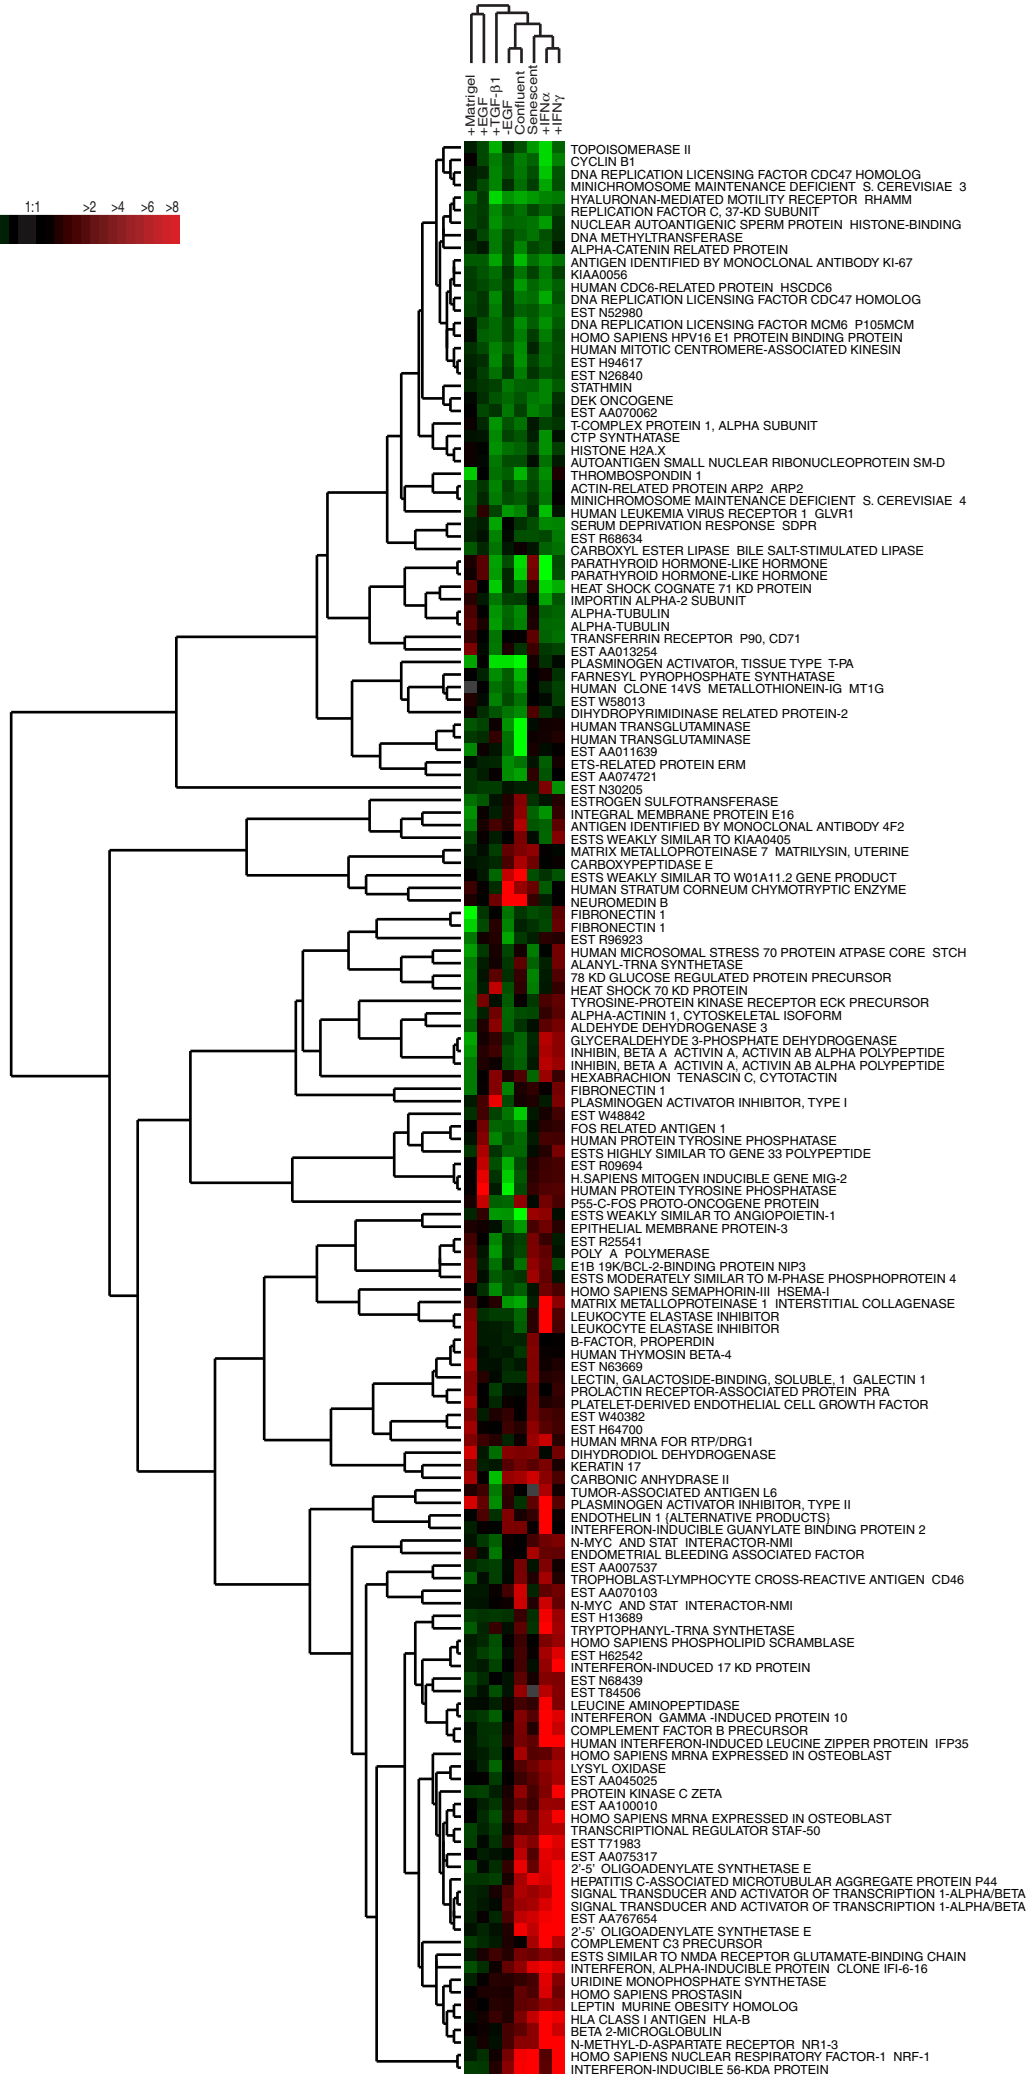

+Metrigel  
+TGF-β1  
+EGF  
-EGF  
Confluent  
Spheroid  
+IFN-γ  
+IFN-γ

TOPOISOMERASE II  
CYCLIN B1  
DNA REPLICATION LICENSING FACTOR CDC47 HOMOLOG  
MINICHROMOSOME MAINTENANCE DEFICIENT 3, CEREBISIAE 3  
HYALURONAN-MEDIATED MOTILITY RECEPTOR RHAMM  
REPLICATION FACTOR C, 37-KD SUBUNIT  
NUCLEAR AUTOANTIGENIC SPERM PROTEIN HISTONE-BINDING  
DNA METHYLTRANSFERASE  
ALPHA-CATENIN RELATED PROTEIN  
ANTIGEN IDENTIFIED BY MONOCLONAL ANTIBODY KI-67  
KIAA0056  
HUMAN CDC6-RELATED PROTEIN HSCDC6  
DNA REPLICATION LICENSING FACTOR CDC47 HOMOLOG  
EST N62980  
DNA REPLICATION LICENSING FACTOR MCM6 P105MCM  
HOMO SAPIENS HPV16 E1 PROTEIN BINDING PROTEIN  
HUMAN MITOTIC CENTROMERE-ASSOCIATED KINESIN  
EST H94817  
EST N26840  
STATHMIN  
DEK ONCOGENE  
EST AA070062  
T-COMPLEX PROTEIN 1, ALPHA SUBUNIT  
CTP SYNTHATASE  
HISTONE H2A.X  
AUTOANTIGEN SMALL NUCLEAR RIBONUCLEOPROTEIN SM-D  
THROMBOSPONDIN 1  
ACTIN-RELATED PROTEIN ARP2 ARP2  
MINICHROMOSOME MAINTENANCE DEFICIENT 3, CEREBISIAE 4  
HUMAN LEUKEMIA VIRUS RECEPTOR 1 GLVR1  
SERUM DEPRIVATION RESPONSE SDPR  
EST R68634  
CARBOXYL ESTER LIPASE BILE SALT-STIMULATED LIPASE  
PARATHYROID HORMONE-LIKE HORMONE  
PARATHYROID HORMONE-LIKE HORMONE  
HEAT SHOCK COGNATE 71 KD PROTEIN  
IMPORTIN ALPHA-2 SUBUNIT  
ALPHA-TUBULIN  
ALPHA-TUBULIN  
TRANSFERRIN RECEPTOR P90, CD71  
EST AA013254  
PLASMINOGEN ACTIVATOR, TISSUE TYPE T-PA  
FARNESYL PYROPHOSPHATE SYNTHATASE  
HUMAN CLONE 14VS METALLOTHIONEIN-IG MT1G  
EST W58013  
DIHYDROPYRIMIDINASE RELATED PROTEIN-2  
HUMAN TRANSGLUTAMINASE  
HUMAN TRANSGLUTAMINASE  
EST AA011639  
ETS-RELATED PROTEIN ERM  
EST AA074721  
EST N30205  
ESTROGEN SULFOTRANSFERASE  
INTEGRAL MEMBRANE PROTEIN E16  
ANTIGEN IDENTIFIED BY MONOCLONAL ANTIBODY 4F2  
ESTS WEAKLY SIMILAR TO KIAA0405  
MATRIX METALLOPROTEINASE 7 MATRILYSIN, UTERINE  
CARBOXYPEPTIDASE E  
ESTS WEAKLY SIMILAR TO W01A11.2 GENE PRODUCT  
HUMAN STRATUM CORNEUM CHYMOTRYPTIC ENZYME  
NEUROMEDIN B  
FIBRONECTIN 1  
FIBRONECTIN 1  
EST R96923  
HUMAN MICROSOMAL STRESS 70 PROTEIN ATPASE CORE STCH  
ALANYL-TRNA SYNTHETASE  
78 KD GLUCOSE REGULATED PROTEIN PRECURSOR  
HEAT SHOCK 70 KD PROTEIN  
TYROSINE-PROTEIN KINASE RECEPTOR ECK PRECURSOR  
ALPHA-ACTININ 1, CYTOSKELETAL ISOFORM  
ALDEHYDE DEHYDROGENASE 3  
GLYCERALDEHYDE 3-PHOSPHATE DEHYDROGENASE  
INHIBIN, BETA A ACTIVIN A, ACTIVIN AB ALPHA POLYPEPTIDE  
INHIBIN, BETA A ACTIVIN A, ACTIVIN AB ALPHA POLYPEPTIDE  
HEXABRACHION TENASCIN C, CYTOTACTIN  
FIBRONECTIN 1  
PLASMINOGEN ACTIVATOR INHIBITOR, TYPE 1  
EST W48942  
OS RELATED ANTIGEN 1  
HUMAN PROTEIN TYROSINE PHOSPHATASE  
ESTS HIGHLY SIMILAR TO GENE 33 POLYPEPTIDE  
EST R96944  
H. SAPIENS MITOGEN INDUCIBLE GENE MIG-2  
HUMAN PROTEIN TYROSINE PHOSPHATASE  
P55-C-FOS PROTO-ONCOGENE PROTEIN  
ESTS WEAKLY SIMILAR TO ANGIOPOIETIN-1  
EPITHELIAL MEMBRANE PROTEIN-3  
EST R26341  
POLY A POLYMERASE  
E1B 19K/BCL-2-BINDING PROTEIN NIP3  
ESTS MODERATELY SIMILAR TO M-PHASE PHOSPHOPROTEIN 4  
HOMO SAPIENS SEMAPHORIN-III HSEMA-1  
MATRIX METALLOPROTEINASE 1 INTERSTITIAL COLLAGENASE  
LEUKOCYTE ELASTASE INHIBITOR  
LEUKOCYTE ELASTASE INHIBITOR  
B-FACTOR, PROPERDIN  
HUMAN THYMOSIN BETA-4  
EST N63669  
LECTIN, GALACTOSIDE-BINDING, SOLUBLE, 1 GALECTIN 1  
PROLACTIN RECEPTOR-ASSOCIATED PROTEIN PRA  
PLATELET-DERIVED ENDOTHELIAL CELL GROWTH FACTOR  
EST W40382  
EST H64700  
HUMAN MRNA FOR RTP/DRG1  
DIHYDRODIOL DEHYDROGENASE  
KERATIN 17  
CARBONIC ANHYDRASE II  
TUMOR-ASSOCIATED ANTIGEN L6  
PLASMINOGEN ACTIVATOR INHIBITOR, TYPE II  
ENDOTHELIN 1 (ALTERNATIVE PRODUCTS)  
INTERFERON-INDUCIBLE GUANYLATE BINDING PROTEIN 2  
N-MYC AND STAT INTERACTOR-NMI  
ENDOMETRIAL BLEEDING ASSOCIATED FACTOR  
EST AA007537  
TROPHOBLAST-LYMPHOCYTE CROSS-REACTIVE ANTIGEN CD46  
EST AA070103  
N-MYC AND STAT INTERACTOR-NMI  
EST H13689  
TRYPTOPHANYL-TRNA SYNTHETASE  
HOMO SAPIENS PHOSPHOLIPID SCRAMBLASE  
EST H62542  
INTERFERON-INDUCED 17 KD PROTEIN  
EST N68439  
EST T84506  
LEUCINE AMINOPEPTIDASE  
INTERFERON GAMMA-INDUCED PROTEIN 10  
COMPLEMENT FACTOR B PRECURSOR  
HUMAN INTERFERON-INDUCED LEUCINE ZIPPER PROTEIN IFP35  
HOMO SAPIENS MRNA EXPRESSED IN OSTEOBLAST  
LYSYL OXIDASE  
EST AA045025  
PROTEIN KINASE C ZETA  
EST AA100010  
HOMO SAPIENS MRNA EXPRESSED IN OSTEOBLAST  
TRANSCRIPTIONAL REGULATOR STAF-50  
EST T71983  
EST AA075317  
2'-5' OLIGOADENYLATE SYNTHETASE E  
HEPATITIS C-ASSOCIATED MICROTUBULAR AGGREGATE PROTEIN P44  
SIGNAL TRANSDUCER AND ACTIVATOR OF TRANSCRIPTION 1-ALPHA/BETA  
SIGNAL TRANSDUCER AND ACTIVATOR OF TRANSCRIPTION 1-ALPHA/BETA  
EST AA767654  
2'-5' OLIGOADENYLATE SYNTHETASE E  
COMPLEMENT C3 PRECURSOR  
ESTS SIMILAR TO NMDA RECEPTOR GLUTAMATE-BINDING CHAIN  
INTERFERON, ALPHA-INDUCIBLE PROTEIN CLONE IFI-6-16  
URIDINE MONOPHOSPHATE SYNTHETASE  
HOMO SAPIENS PROSTASIN  
LEPTIN MURINE OBESITY HOMOLOG  
HLA CLASS I ANTIGEN HLA-B  
BETA 2-MICROGLOBULIN  
N-METHYL-D-ASPARTATE RECEPTOR NR1-3  
HOMO SAPIENS NUCLEAR RESPIRATORY FACTOR-1 NRF-1  
INTERFERON-INDUCIBLE 56-KDA PROTEIN
